# Supplementary material for: Rare copy number variants analysis identifies novel candidate genes in heterotaxy syndrome patients with congenital heart defects
Source: PubMed Central journal article supplement (PMC5975672; doi:10.1186/s13073-018-0549-y), 2018-05-30
Supplement: 13073_2018_549_MOESM1_ESM.pdf [file 13073_2018_549_MOESM1_ESM.pdf]

## Additional file 1: Supplemental Tables S1-S7

Additional file 1: Table S1. MO sequences, injection doses, and total embryo numbers analyzed for heart looping and gene expression

| Gene                     | MO sequence 5' 3'         | MO's function        | Blocking site | Knockdown efficacy analysis | Dose (ng) for heart looping analysis | Numbers for heart looping analysis | Dose (ng) for gene expression analysis | Numbers for pitx2 expression analysis | Numbers for lefty2 expression analysis |
|--------------------------|---------------------------|----------------------|---------------|-----------------------------|--------------------------------------|------------------------------------|----------------------------------------|---------------------------------------|----------------------------------------|
| <i>numb</i>              | GGAAACTCTGCCGTAGCTTATTCAT | translation blocking | ATG           | western blot                | 8                                    | 258                                | 8                                      | 134                                   | 128                                    |
| <i>pacrg</i>             | TAGCCAAAGGTTCAAAGGTTCTCAT | translation blocking | ATG           | western blot                | 8                                    | 333                                | 8                                      | 138                                   | 120                                    |
| <i>tctn2</i>             | TTCGCTCAAAGTGGACTTACCAACA | splice blocking      | E111          | western blot                | 8                                    | 235                                | 8                                      | 136                                   | 157                                    |
| <i>dnah10</i>            | AGATGAGAATCACGCACATGGTTGA | splice blocking      | E5I5          | reverse transcription PCR   | 8                                    | 285                                | 8                                      | 161                                   | 155                                    |
| <i>mf115</i>             | CTACCAGCGACACGGACTCACCG   | splice blocking      | E111          | reverse transcription PCR   | 2                                    | 230                                | 2                                      | 168                                   | 152                                    |
| <i>cfap46/<br/>ttc40</i> | CTTAGTGAACAGTGTTTTGACGTAC | splice blocking      | E111          | reverse transcription PCR   | 8                                    | 227                                | 8                                      | 134                                   | 174                                    |
| <i>galnt11</i>           | GCCATTATCAGGCCCTCGCTGATGA | translation blocking | ATG           | western blot                | 8                                    | 253                                | 4                                      | 97                                    | 139                                    |
| <i>Standard control</i>  | CCTCTTACCTCAGTTACAATTTATA | —                    | /             | —                           | 8                                    | 337                                | 8                                      | 158                                   | 161                                    |

**Additional file 1: Table S2. Specific primers and vector used to produce genes' whole-length mRNA**

| <b>Gene</b>    | <b>Primer F</b>                | <b>Primer R</b>                     | <b>Length (bp)</b> | <b>Restriction Enzyme Digestion</b> | <b>Vector</b> |
|----------------|--------------------------------|-------------------------------------|--------------------|-------------------------------------|---------------|
| <i>galnt11</i> | CGGGATCCTCACCAGCGAGTAACGG      | CCGCTCGAGCGTCAGACCAAGGCTTCA         | 2060               | BamHI, XhoI                         | pSC2+         |
| <i>pacrg</i>   | CGGGATCCGAGTTTTGTTTCTGTTTATCGG | CCGCTCGAGCAGAAATAAGAAGTGTAACATAAGGT | 853                | BamHI, XhoI                         | pSC2+         |
| <i>numb</i>    | AGCGAATTCATGAATAAGCTG          | TCCCTCGAGTTATAGTTCAATCTCAAA         | 1857               | BamHI, XhoI                         | pSC2+         |
| <i>tctn2</i>   | CGGAATTCTCCAGGCGAGTGTGACATACG  | CCGCTCGAGCCTTTAGCCAGAGCCTCAGAATAAG  | 1512               | EcoRI, XhoI                         | pSC2+         |
| <i>mf115</i>   | CGGGATCCAAAACATGGCGGAGGCTGCT   | CCGCTCGAGTCAGAAGGACCATCTCTCCG       | 938                | BamHI, XhoI                         | pSC2+         |

**Additional file 1: Table S3. Antisense RNA probes conducted for whole mount in situ hybridization**

| Gene           | Primer                                                         | Length (bp) | vector      | Linearizing | Promoter |
|----------------|----------------------------------------------------------------|-------------|-------------|-------------|----------|
| <i>pacrg</i>   | F: ATGAGAACCTTTGAACCTTTGGCTA<br>R: GTTGAGAAGGCAGGACTCGTAGGTGGG | 696         | pGEM-T easy | Sall        | T7       |
| <i>numb</i>    | F: TGAAGACGGCGGGTAAGA<br>R: TGGTGAGGAGGCTGGTTT                 | 860         | pGEM-T easy | SacII       | SP6      |
| <i>galnt11</i> | F: GAGTCAAGTGCGTAAAGGC<br>R: CACATCCAAATCCGAAAA                | 849         | pGEM-T easy | Sall        | T7       |
| <i>tctn2</i>   | F: GTACAGAGGACCCAGAT<br>R: AAAGCATAGTTCAATCG                   | 871         | pGEM-T easy | SpeI        | T7       |
| <i>dnah10</i>  | F: TGCGCGGTGTCAGTTTC<br>R: TGTGATTTGTGTGTGCC                   | 1140        | pGEM-T easy | Sall        | T7       |
| <i>rnf115</i>  | F: TGTAAGGGTGAAGTGAG<br>R: GCGGTTGAGAAAAGTAG                   | 1034        | pGEM-T easy | NcoI        | SP6      |
| <i>cfap46</i>  | F: TTGAAGGATGAAAACCC<br>R: TGAGCACAGCACAGGAC                   | 1031        | pGEM-T easy | Sall        | T7       |
| <i>pitx2</i>   | F: TCTCCTTGCTCTCGGCT<br>R: CTTGTTCTGGGATTCG                    | 1288        | pGEM-T easy | SpeI        | T7       |
| <i>lefty2</i>  | F: TCAGCGTCTTGTGTTTCG<br>R: TCAGTGGGGATTTGGGG                  | 872         | pGEM-T easy | Sall        | T7       |

**Additional file 1: Table S4. The frequency of each candidate CNV in normal Chinese individuals and non-heterotaxy patients with developmental delay/intellectual disability**

| <b>ID</b> | <b>chromosome-position</b>    | <b>Type</b>  | <b>Size (kbp)</b> | <b>Frequency of NCI</b> | <b>Frequency of DD/ID</b> |
|-----------|-------------------------------|--------------|-------------------|-------------------------|---------------------------|
| 5         | chr4:104,554,264-105,123,728  | Internal dup | 569.464           | 0                       | 0                         |
| 5         | chr6:26,019,198-26,227,973    | Genic dup    | 208.775           | 0                       | 0                         |
| 6         | chr7:151,816,201-151,967,676  | Internal dup | 151.475           | 1                       | 1                         |
| 7         | chr1:145,625,128-145,927,662  | Genic del    | 302.534           | 0                       | 0                         |
| 7         | chr4:48,936,820-49,093,788    | Genic dup    | 156.968           | 1                       | 1                         |
| 10        | chr5:115,247,380-115,683,172  | Genic dup    | 435.792           | 0                       | 0                         |
| 16        | chr6:54,138,106-54,277,341    | Genic dup    | 139.235           | 0                       | 0                         |
| 18        | chr12:173,786-356,461         | Genic dup    | 182.675           | 0                       | 0                         |
| 20        | chr12:123,357,010-124,310,519 | Genic dup    | 953.509           | 0                       | 0                         |
| 20        | chr19:47,308,130-47,418,258   | Genic dup    | 110.128           | 0                       | 0                         |
| 26        | chr11:60,408,411-60,465,698   | Genic del    | 57.287            | 0                       | 0                         |
| 31        | chr10:6,254,055-6,374,584     | Internal dup | 120.529           | 0                       | 0                         |
| 34        | chr4:93,875,432-93,988,049    | Genic del    | 112.617           | 0                       | 0                         |
| 39        | chr8:47,398,661-48,407,568    | Genic dup    | 1008.907          | 0                       | 0                         |
| 40        | chr14:73,620,299-73,786,493   | Genic dup    | 166.194           | 0                       | 0                         |
| 43        | chr4:101,476,709-101,668,938  | Genic del    | 192.229           | 0                       | 0                         |
| 59        | chr2:157,170,397-157,315,649  | Internal dup | 145.252           | 0                       | 0                         |
| 59        | chr6:163,549,870-163,842,358  | Genic dup    | 292.488           | 0                       | 0                         |
| 59        | chr9:16,826,417-16,931,236    | Internal dup | 104.819           | 0                       | 0                         |
| 63        | chr3:158,198,274-158,256,949  | Genic del    | 58.675            | 0                       | 0                         |
| 63        | chr10:134,358,785-134,921,135 | Genic dup    | 562.35            | 0                       | 0                         |

NCI: normal Chinese individuals; DD: developmental delay; ID: intellectual disability; Genic del: deletion of at least one coding exon; Genic dup: full duplication of at least one gene; Internal dup: duplication of internal exons

**Additional file 1: Table S5. The function of the genes associated with the 19 rare CNV segments**

| Chromosome | Gene             | OMIM number | Component                                                    | Function                                                          | Ortholog with zebrafish |
|------------|------------------|-------------|--------------------------------------------------------------|-------------------------------------------------------------------|-------------------------|
| 1q21.1     | <i>RNF115</i>    | —           | ring finger protein 115                                      | <b>E3 ubiquitin-protein ligase</b>                                | 65.56                   |
|            | <i>CD160</i>     | 604463      | CD160 Molecule                                               | MHC class I receptor activity                                     | —                       |
|            | <i>PDZK1</i>     | 603831      | PDZ Domain Containing 1                                      | ion transport, second messenger cascades                          | 56.8                    |
|            | <i>GPR89A</i>    | 612821      | G Protein-Coupled Receptor 89A                               | voltage-gated ion channel activity                                | 90                      |
|            | <i>GPR89C</i>    | —           | G Protein-Coupled Receptor 89C                               | voltage-gated ion channel activity                                | 90                      |
|            | <i>PDZK1P1</i>   | —           | PDZ Domain Containing 1 Pseudogene 1                         | Non-Protein coding RNA                                            | —                       |
| 2q24.1     | <i>NR4A2</i>     | 601828      | Nuclear Receptor Subfamily 4 Group A Member 2                | RNA polymerase II regulatory region sequence-specific DNA binding | 77.18                   |
|            | <i>GPD2</i>      | 138430      | Glycerol-3-Phosphate Dehydrogenase 2                         | glycerol-3-phosphate dehydrogenase activity                       | 71.47                   |
| 3q25.32    | <i>RSRC1</i>     | 613352      | Arginine And Serine Rich Coiled-Coil 1                       | pre-mRNA splicing                                                 | 56                      |
| 4q22.2     | <i>GRID2</i>     | 602368      | Glutamate Ionotropic Receptor Delta Type Subunit 2           | glutamate receptor activity                                       | 72.36                   |
| 4q24       | <i>EMCN-IT3</i>  | —           | Long Intergenic Non-Protein Coding RNA                       | Non-Protein coding RNA                                            | —                       |
| 4q24       | <i>TACR3</i>     | 162332      | Tachykinin Receptor 3                                        | G-protein coupled receptor activity                               | 66.05                   |
| 5q23.1     | <i>AP3S1</i>     | 601507      | Adaptor Related Protein Complex 3 Sigma 1 Subunit            | transporter activity                                              | —                       |
|            | <i>AQPEP</i>     | —           | laeverin                                                     | peptidase activity                                                | 31                      |
|            | <i>LOC644100</i> | —           | ADP ribosylation factor like GTPase 14 effector protein like | —                                                                 | —                       |
|            | <i>COMMD10</i>   | 616704      | COMM Domain Containing 10                                    | protein binding                                                   | 60.1                    |
| 6p12.1     | <i>TINAG</i>     | 606749      | Tubulointerstitial Nephritis Antigen                         | adhesion of proximal tubule epithelial cells                      | —                       |
| 6p22.2     | <i>HIST1H3A</i>  | 602810      | Histone Cluster 1 H3 Family Member A                         | DNA binding                                                       | 82.11                   |
|            | <i>HIST1H4A</i>  | 602822      | Histone Cluster 1 H4 Family Member A                         | DNA binding                                                       | 80.26                   |
|            | <i>HIST1H4B</i>  | 602829      | Histone Cluster 1 H4 Family Member B                         | DNA binding                                                       | 80.91                   |
|            | <i>HIST1H3B</i>  | 602819      | Histone Cluster 1 H3 Family Member B                         | DNA binding                                                       | —                       |
|            | <i>HIST1H2AB</i> | 602795      | Histone Cluster 1 H2A Family Member B                        | DNA binding                                                       | —                       |
|            | <i>HIST1H2BB</i> | 602803      | Histone Cluster 1 H2B Family Member B                        | DNA binding                                                       | —                       |
|            | <i>HIST1H3C</i>  | 602812      | Histone Cluster 1 H3 Family Member C                         | DNA binding                                                       | 80.88                   |

|              |                     |        |                                                              |                                                                                          |       |
|--------------|---------------------|--------|--------------------------------------------------------------|------------------------------------------------------------------------------------------|-------|
|              | <i>HIST1H1C</i>     | 142710 | Histone Cluster 1 H1 Family Member C                         | DNA binding                                                                              | 72    |
|              | <i>HFE</i>          | 613609 | Hemochromatosis                                              | antigen binding                                                                          | —     |
|              | <i>HIST1H4C</i>     | 602827 | Histone Cluster 1 H4 Family Member C                         | DNA binding                                                                              | 100   |
|              | <i>HIST1H1T</i>     | 142712 | Histone Cluster 1 H1 Family Member T                         | DNA binding                                                                              | —     |
|              | <i>HIST1H2BC</i>    | 602847 | Histone Cluster 1 H2B Family Member C                        | DNA binding                                                                              | —     |
|              | <i>HIST1H2AC</i>    | 602794 | Histone Cluster 1 H2A Family Member C                        | DNA binding                                                                              | —     |
|              | <i>HIST1H1E</i>     | 142220 | Histone Cluster 1 H1 Family Member E                         | DNA binding                                                                              | 74    |
|              | <i>HIST1H2BD</i>    | 602799 | Histone Cluster 1 H2B Family Member D                        | DNA binding                                                                              | —     |
|              | <i>HIST1H2BE</i>    | 602805 | Histone Cluster 1 H2B Family Member E                        | DNA binding                                                                              | —     |
|              | <i>HIST1H4D</i>     | 602823 | Histone Cluster 1 H4 Family Member D                         | DNA binding                                                                              | 77.67 |
|              | <i>HIST1H3D</i>     | 602811 | Histone Cluster 1 H3 Family Member D                         | DNA binding                                                                              | 84.31 |
|              | <i>HIST1H2AD</i>    | 602792 | Histone Cluster 1 H2A Family Member D                        | DNA binding                                                                              | —     |
|              | <i>HIST1H2BF</i>    | 602804 | Histone Cluster 1 H2B Family Member F                        | DNA binding                                                                              | —     |
|              | <i>HIST1H4E</i>     | 602830 | Histone Cluster 1 H4 Family Member E                         | DNA binding                                                                              | 83.17 |
|              | <i>HIST1H2BG</i>    | 602798 | Histone Cluster 1 H2B Family Member G                        | DNA binding                                                                              | —     |
|              | <i>HIST1H2AE</i>    | 602786 | Histone Cluster 1 H2A Family Member E                        | DNA binding                                                                              | —     |
|              | <i>HIST1H3E</i>     | 602813 | Histone Cluster 1 H3 Family Member E                         | DNA binding                                                                              | 83.58 |
| 6q26         | <i>PACRG</i>        | 608427 | Parkin Coregulated                                           | <b>correlated with motile cilia during development; ubiquitin protein ligase binding</b> | 91    |
|              | <i>PACRG-AS1</i>    | —      | PACRG Antisense RNA 1                                        | Non-Protein coding RNA                                                                   | —     |
|              | <i>DKFZp451B082</i> | —      | Uncharacterized LOC401282                                    | Non-Protein coding RNA                                                                   | —     |
|              | <i>CAHM</i>         | 615930 | Colon Adenocarcinoma Hypermethylated                         | Non-Protein coding RNA                                                                   | —     |
|              | <i>QKI</i>          | 609590 | QKI, KH Domain Containing RNA Binding                        | RNA binding, myelination                                                                 | 80.3  |
| 8q11.1q11.21 | <i>LINC00293</i>    | —      | Long Intergenic Non-Protein Coding RNA 293                   | Non-Protein coding RNA                                                                   | —     |
|              | <i>LOC100287846</i> | —      | Patched 1 Pseudogene                                         | Pseudogene                                                                               | —     |
|              | <i>KIAA0146</i>     | 615384 | KIAA0146 ortholog/Scaffolding Protein Involved In DNA Repair | DNA double-strand break (DBS) repair                                                     | 49.13 |
| 9p22.2       | <i>BNC2</i>         | 608669 | Basonuclin 2                                                 | zinc ion binding                                                                         | 61    |

|          |                     |        |                                                                 |                                                  |       |
|----------|---------------------|--------|-----------------------------------------------------------------|--------------------------------------------------|-------|
| 10p15.1  | <i>PFKFB3</i>       | 605319 | 6-Phosphofructo-2-Kinase/Fructose-2,6-Biphosphatase 3           | 6-phosphofructo-2-kinase activity                | 71.41 |
|          | <i>LOC399715</i>    | —      | Uncharacterized LOC399715                                       | Non-Protein coding RNA                           | —     |
| 10q26.3  | <i>INPP5A</i>       | 600106 | Inositol Polyphosphate-5-Phosphatase A                          | inositol-polyphosphate 5-phosphatase activity    | 74    |
|          | <i>NKX6-2</i>       | 605955 | NK6 Homeobox 2                                                  | DNA binding, transcription factor activity       | 72.99 |
|          | <i>TTC40</i>        | —      | Cilia And Flagella Associated Protein 46                        | <b>cilium movement</b>                           | 52.04 |
|          | <i>LOC399829</i>    | —      | long intergenic non-protein coding RNA 1168                     | Non-Protein coding RNA                           | —     |
|          | <i>GPR123</i>       | 612302 | G-Protein Coupled Receptor 123                                  | transmembrane signaling receptor activity        | 62.25 |
| 11q12.2  | <i>LINC00301</i>    | —      | Long Intergenic Non-Protein Coding RNA 301                      | Non-Protein coding RNA                           | —     |
| 12p13.33 | <i>IQSEC3</i>       | 612118 | IQ Motif And Sec7 Domain 3                                      | ARF guanyl-nucleotide exchange factor activity   | 62    |
|          | <i>LOC574538</i>    | —      | Uncharacterized LOC574538                                       | RNA Gene                                         | —     |
|          | <i>SLC6A12</i>      | 603080 | Solute Carrier Family 6 Member 12                               | neurotransmitter transporter                     | 62    |
|          | <i>SLC6A13</i>      | 615097 | Solute Carrier Family 6 Member 13                               | Sodium-dependent GABA and taurine transporter    | 74    |
| 12q24.31 | <i>VPS37B</i>       | 610037 | acuolar Protein Sorting 37 Homolog B                            | a regulator of vesicular trafficking process     | 60.4  |
|          | <i>ABCB9</i>        | 605453 | ATP Binding Cassette Subfamily B Member 9                       | ATP binding                                      | 59.58 |
|          | <i>OGFOD2</i>       | —      | 2-Oxoglutarate And Iron Dependent Oxygenase Domain Containing 2 | oxidoreductase activity                          | 58.36 |
|          | <i>ARL6IP4</i>      | 607668 | ADP Ribosylation Factor Like GTPase 6 Interacting Protein 4     | modulates alternative pre-mRNA splicing          | 44    |
|          | <i>PITPNM2</i>      | 608920 | Phosphatidylinositol Transfer Protein Membrane Associated 2     | phosphatidylinositol transporter activity        | 56    |
|          | <i>MIR4304</i>      | —      | MicroRNA 4304                                                   | RNA Gene                                         | —     |
|          | <i>LOC100507091</i> | —      | PITPNM2 antisense RNA 1                                         | Non-Protein coding RNA                           | —     |
|          | <i>MPHOSPH9</i>     | 605501 | M-Phase Phosphoprotein 9                                        | M-phase enzymatic activities                     | 38    |
|          | <i>C12orf65</i>     | 613541 | Chromosome 12 Open Reading Frame 65                             | translation release factor                       | 56    |
|          | <i>CDK2AP1</i>      | 602198 | Cyclin Dependent Kinase 2 Associated Protein 1                  | specific inhibitor of the cell-cycle kinase CDK2 | 71.65 |
|          | <i>SBNO1</i>        | 614274 | Strawberry Notch Homolog 1                                      | molecular function                               | 70.25 |
|          | <i>SETD8</i>        | 607240 | SET Domain Containing (Lysine Methyltransferase) 8              | methyltransferase activity                       | 65.26 |

|          |                 |        |                                                           |                                                               |       |
|----------|-----------------|--------|-----------------------------------------------------------|---------------------------------------------------------------|-------|
|          | <i>RILPL2</i>   | 614093 | Rab Interacting Lysosomal Protein Like 2                  | cellular protein transport                                    | 61.46 |
|          | <i>SNRNP35</i>  | —      | Small Nuclear Ribonucleoprotein U11/U12 Subunit 35        | RNA binding                                                   | 69.25 |
|          | <i>RILPL1</i>   | 614092 | Rab Interacting Lysosomal Protein Like 1                  | cellular protein transport                                    | 71.17 |
|          | <i>MIR3908</i>  | —      | MicroRNA 3908                                             | RNA Gene                                                      | —     |
|          | <i>TMED2</i>    | —      | Transmembrane P24 Trafficking Protein 2                   | vesicular protein trafficking                                 | 80.15 |
|          | <i>DDX55</i>    | —      | DEAD-Box Helicase 55                                      | ATP-binding RNA helicase                                      | 69.03 |
|          | <i>EIF2B1</i>   | 606686 | Eukaryotic Translation Initiation Factor 2B Subunit Alpha | translation initiation factor                                 | 77    |
|          | <i>GTF2H3</i>   | 601750 | General Transcription Factor IIH Subunit 3                | protein kinase activity, damaged DNA binding                  | 71    |
|          | <i>TCTN2</i>    | 613846 | Tectonic Family Member 2                                  | <b>hedgehog signaling transduction, regulate ciliogenesis</b> | 48.17 |
|          | <i>ATP6V0A2</i> | 611716 | ATPase H <sup>+</sup> Transporting V0 Subunit A2          | ATPase binding                                                | 67    |
|          | <i>DNAH10</i>   | 605884 | Dynein Axonemal Heavy Chain 10                            | <b>microtubule motor activity, ATPase activity</b>            | 67.65 |
| 14q24.2  | <i>PSEN1</i>    | 104311 | Presenilin 1                                              | endopeptidase activity                                        | 70.82 |
|          | <i>PAPLN</i>    | —      | Papilin, Proteoglycan Like Sulfated Glycoprotein          | metalloendopeptidase activity                                 | 54.68 |
|          | <i>NUMB</i>     | 603728 | NUMB, Endocytic Adaptor Protein                           | <b>suppress notch activity, protein binding</b>               | 65.28 |
| 19q13.32 | <i>SNAR-E</i>   | —      | Small ILF3/NF90-Associated RNA E                          | RNA Gene                                                      | —     |
|          | <i>AP2S1</i>    | 602242 | Adaptor Related Protein Complex 2 Sigma 1 Subunit         | contributes to clathrin adaptor activity                      | 85.68 |



**Additional file 1: Table S6. The bioinformatics information on the variant of *LEFTY1* in the patient with CNV of *TTC40* (*CFAP46*)**

| ID | Gene          | Mutation site | Amino acid change | Exonic Function | SIFT score | SIFT pred | PP2 HDIV score | PP2 HDIV pred | Mutation Taster score | Mutation Taster pred |
|----|---------------|---------------|-------------------|-----------------|------------|-----------|----------------|---------------|-----------------------|----------------------|
| 63 | <i>LEFTY1</i> | c. 841 A > G  | p.Trp281Arg       | nonsynonymous   | 0          | Del       | 0.957          | Dam           | 1                     | Dis                  |

PP2: Polyphen2; pred: predicting; Del: Deleterious; Dam: Probably damaging; Dis: disease\_causing

**Additional file 1: Table S7. The bioinformatics information on the variants of candidate genes**

| ID  | Gene          | Mutation site | Amino acid change | Exonic Function | SIFT score | SIFT pred | PP2 HDIV score | PP2 HDIV pred | Mutation Taster score | Mutation Taster pred |
|-----|---------------|---------------|-------------------|-----------------|------------|-----------|----------------|---------------|-----------------------|----------------------|
| 10  | <i>DNAH10</i> | c.G11888A     | p.R3963H          | nonsynonymous   | 0          | Del       | 1              | Dam           | 1                     | Dis                  |
| 21  | <i>DNAH10</i> | c.T12026C     | p.L4009P          | nonsynonymous   | 0          | Del       | 1              | Dam           | 1                     | Dis                  |
| 79  | <i>DNAH10</i> | c.C10075T     | p.L3359F          | nonsynonymous   | 0          | Del       | 1              | Dam           | 1                     | Dis                  |
| 93  | <i>RNF115</i> | c.G799A       | p.V267I           | nonsynonymous   | 0.16       | Tol       | 0.1            | Ben           | 1                     | Dis                  |
| 5   | <i>TCTN2</i>  | c.C91T        | p.P31S            | nonsynonymous   | 0          | Del       | 1              | Dam           | 0.999                 | Dis                  |
| 101 | <i>NUMB</i>   | c.C518T       | p.A173V           | nonsynonymous   | 0.12       | Tol       | 1              | Dam           | 1                     | Dis                  |

PP2: Polyphen2; pred: predicting; Del: Deleterious; Tol: tolerated; Dam: Probably damaging; Ben: benign; Dis: disease\_causing
